# Supplementary material
Source: publisher site journal article supplement (https://www.spandidos-publications.com/5072/downloadSupplementary)

Figure S1. Representative images of CXCL12/SDF-1-positive cells in bone marrow samples. Immunoreactivity (black arrows) for CXCL12 in femoral metaphyseal trabecules of the (A) control and (B) G-CSF-treatment groups and around the extraction socket in the maxillary bone of the (C) control and (D) G-CSF-treatment groups is shown as CXCL12/SDF-1-positive cells located among the hematopoietic cells. The number of CXCL12/SDF-1-positive cells was decreased by G-CSF treatment. Scale bar indicates 50  $\mu$ m. CXCL12, chemokine (C-X-C motif) ligand 12; SDF-1, stromal cell-derived factor 1.

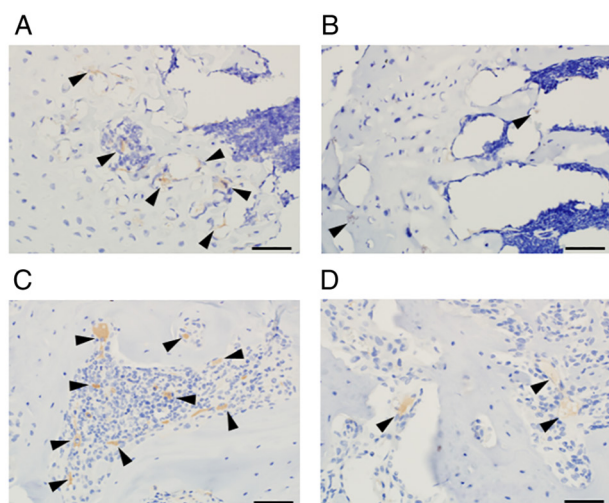

Supplement: Supplementary file 1 [file downloadSupplementary]
